# Supplementary material for: An ancient metalloenzyme evolves through metal preference modulation
Source: Springer Nature journal article supplement (doi:10.1038/s41559-023-02012-0), 2023-04-10
Supplement: 41559_2023_2012_MOESM18_ESM.pdf [file 41559_2023_2012_MOESM18_ESM.pdf]

**Table 1 Data collection and refinement statistics (molecular replacement)**

|                             | <i>CPR<br/>Parkubacteria<br/>Wolfbacteria<br/>SodFM1</i> | <i>CPR<br/>Parkubacteria<br/>Wolfbacteria<br/>SodFM1mutant</i> | <i>Bacteroides<br/>fragilis SodFM2</i> | <i>Bacteroides<br/>fragilis SodFM2<br/>mutant</i> |
|-----------------------------|----------------------------------------------------------|----------------------------------------------------------------|----------------------------------------|---------------------------------------------------|
| <b>Data collection</b>      |                                                          |                                                                |                                        |                                                   |
| Space group                 | P2 <sub>1</sub>                                          | P2 <sub>1</sub>                                                | P2 <sub>1</sub>                        | P2 <sub>1</sub> 2 <sub>1</sub> 2 <sub>1</sub>     |
| Cell dimensions             |                                                          |                                                                |                                        |                                                   |
| <i>a, b, c</i> (Å)          | 40.53, 70.59,<br>57.79                                   | 46.5, 69.7, 58.0                                               | 71.12, 100.11,<br>103.60               | 79.4, 117.1, 139.3                                |
| $\alpha, \beta, \gamma$ (°) | 90.0, 100.3, 90.0                                        | 90.00, 100.2, 90.0                                             | 90.0, 91.8, 90.0                       | 90.0, 90.0, 90.0                                  |
| Wavelength (Å)              | 0.89843                                                  | 0.89842                                                        | 0.89843                                | 0.89842                                           |
| Resolution (Å)              | 70.59-2.10 (2.16-<br>2.10)*                              | 69.00-2.00 (2.04-<br>2.00)                                     | 103.55-1.60<br>(1.63-1.60)             | 69.00-2.00 (2.04-<br>2.00)                        |
| $CC_{1/2}$                  | 0.996 (0.640)                                            | 0.999 (0.556)                                                  | 0.998 (0.548)                          | 0.999 (0.444)                                     |
| $I / \sigma I$              | 7.3 (1.0)                                                | 6.5 (1.4)                                                      | 12.0 (1.3)                             | 11.0 (1.1)                                        |
| Completeness (%)            | 100.0 (99.9)                                             | 98.7 (97.6)                                                    | 100.0 (100.0)                          | 100.0 (100.0)                                     |
| Redundancy                  | 14.1 (13.6)                                              | 6.5 (5.4)                                                      | 7.0 (7.2)                              | 13.5 (14.2)                                       |
| <b>Refinement</b>           |                                                          |                                                                |                                        |                                                   |
| Resolution (Å)              | 70.59-2.10                                               | 69.00-2.00                                                     | 103.55-1.60                            | 69.00-2.00                                        |
| No. reflections             | 21632                                                    | 43267                                                          | 190799                                 | 88446                                             |
| $R_{work} / R_{free}$       | 20.89 / 25.63                                            | 14.26 / 23.14                                                  | 13.43 / 20.22                          | 19.27 / 22.89                                     |
| No. atoms                   |                                                          |                                                                |                                        |                                                   |
| Protein                     | 3308                                                     | 3330                                                           | 12321                                  | 9216                                              |
| Ligand/ion                  | 2                                                        | 2                                                              | 8                                      | 6                                                 |
| Water                       | 11                                                       | 193                                                            | 1507                                   | 535                                               |
| <i>B</i> -factors           |                                                          |                                                                |                                        |                                                   |
| Protein                     | 38.3                                                     | 32.4                                                           | 24.9                                   | 41.5                                              |
| Ligand/ion                  | 27.5                                                     | 25.3                                                           | 24.6                                   | 31.9                                              |
| Water                       | 26.6                                                     | 38.7                                                           | 32.3                                   | 41.0                                              |
| R.m.s. deviations           |                                                          |                                                                |                                        |                                                   |
| Bond lengths (Å)            | 1.82                                                     | 1.56                                                           | 1.56                                   | 1.55                                              |
| Bond angles (°)             | 0.011                                                    | 0.010                                                          | 0.010                                  | 0.010                                             |
| Ramachandran %              |                                                          |                                                                |                                        |                                                   |
| favoured                    | 97.59                                                    | 97.8                                                           | 97.6                                   | 97.0                                              |
| PDB file code               | 8AVK                                                     | 8AVN                                                           | 8AVL                                   | 8AVM                                              |

\*Values in parentheses are for highest-resolution shell.
